# Supplementary material for: Predicting improved protein conformations with a temporal deep recurrent neural network
Source: PubMed Central journal article supplement (PMC6122789; doi:10.1371/journal.pone.0202652), 2018-09-04
Supplement: pone.0202652.s008.pdf [file pone.0202652.s008.pdf]

S2 Table. : Trajectory and cross validation overview for all protein targets. Each row shows the trajectory name, the cross-validation fold assignment, the number of snapshots per trajectory, the total number of sampling runs and the absolute number of sampled improved, no-change and decreased states.

| Traj. Name      | Fold | # Snap. | # Traj. | I    | N    | D     |
|-----------------|------|---------|---------|------|------|-------|
| TR759_dist_rst  | 0    | 12008   | 8       | 7401 | 1995 | 2612  |
| TR759_no_rst    | 0    | 11208   | 8       | 4260 | 2231 | 4717  |
| TR759_point_rst | 0    | 11208   | 8       | 5517 | 1701 | 3990  |
| TR782_no_rst    | 0    | 11208   | 8       | 30   | 171  | 11007 |
| TR782_point_rst | 0    | 11208   | 8       | 149  | 948  | 10111 |
| TR810_dist_rst  | 0    | 12008   | 8       | 18   | 474  | 11516 |
| TR810_no_rst    | 0    | 11208   | 8       | 55   | 690  | 10463 |
| TR810_point_rst | 0    | 11208   | 8       | 92   | 7104 | 4012  |
| TR856_dist_rst  | 0    | 12008   | 8       | 0    | 1    | 12007 |
| TR856_no_rst    | 0    | 11208   | 8       | 0    | 3    | 11205 |
| TR856_point_rst | 0    | 11208   | 8       | 0    | 267  | 10941 |
| TR869_cm_excl   | 0    | 24505   | 5       | 18   | 3077 | 21410 |
| TR869_cm_min    | 0    | 24505   | 5       | 3    | 882  | 23620 |
| TR869_point_rst | 0    | 11208   | 8       | 35   | 2599 | 8574  |
| TR891_cm_excl   | 0    | 24505   | 5       | 4    | 1895 | 22606 |
| TR891_cm_min    | 0    | 24505   | 5       | 28   | 2622 | 21855 |
| TR891_point_rst | 0    | 11208   | 8       | 12   | 2230 | 8966  |
| TR283_dist_rst  | 1    | 12008   | 8       | 318  | 1074 | 10616 |
| TR283_no_rst    | 1    | 11208   | 8       | 19   | 531  | 10658 |
| TR283_point_rst | 1    | 11208   | 8       | 0    | 8    | 11200 |
| TR780_dist_rst  | 1    | 12008   | 8       | 4242 | 1940 | 5826  |
| TR780_no_rst    | 1    | 11208   | 8       | 1167 | 1191 | 8850  |
| TR780_point_rst | 1    | 11208   | 8       | 5729 | 4651 | 828   |
| TR837_dist_rst  | 1    | 12008   | 8       | 1268 | 886  | 9854  |
| TR837_no_rst    | 1    | 11208   | 8       | 1329 | 1448 | 8431  |
| TR837_point_rst | 1    | 11208   | 8       | 727  | 1336 | 9145  |
| TR854_dist_rst  | 1    | 12008   | 8       | 329  | 991  | 10688 |
| TR854_no_rst    | 1    | 11208   | 8       | 376  | 1084 | 9748  |
| TR854_point_rst | 1    | 11208   | 8       | 2943 | 6376 | 1889  |
| TR879_cm_excl   | 1    | 24505   | 5       | 0    | 11   | 24494 |
| TR879_cm_min    | 1    | 24505   | 5       | 0    | 27   | 24478 |
| TR879_point_rst | 1    | 11208   | 8       | 0    | 40   | 11168 |
| TR921_cm_excl   | 1    | 24505   | 5       | 17   | 6751 | 17737 |
| TR921_cm_min    | 1    | 24505   | 5       | 27   | 9337 | 15141 |
| TR921_point_rst | 1    | 11208   | 8       | 13   | 6552 | 4643  |
| TR217_dist_rst  | 2    | 12008   | 8       | 0    | 13   | 11995 |
| TR217_no_rst    | 2    | 11208   | 8       | 0    | 15   | 11193 |
| TR217_point_rst | 2    | 11208   | 8       | 583  | 6864 | 3761  |
| TR760_dist_rst  | 2    | 12008   | 8       | 0    | 8    | 12000 |
| TR760_no_rst    | 2    | 11208   | 8       | 0    | 8    | 11200 |
| TR760_point_rst | 2    | 11208   | 8       | 381  | 5509 | 5318  |
| TR786_dist_rst  | 2    | 12008   | 8       | 2    | 74   | 11932 |
| TR786_no_rst    | 2    | 11208   | 8       | 1    | 60   | 11147 |
| TR786_point_rst | 2    | 11208   | 8       | 3451 | 4746 | 3011  |
| TR816_dist_rst  | 2    | 12008   | 8       | 1017 | 488  | 10503 |
| TR816_no_rst    | 2    | 11208   | 8       | 1598 | 1024 | 8586  |
| TR816_point_rst | 2    | 11208   | 8       | 1409 | 1754 | 8045  |
| TR862_cm_excl   | 2    | 24505   | 5       | 422  | 3323 | 20760 |
| TR862_cm_min    | 2    | 24505   | 5       | 2444 | 4205 | 17856 |
| TR862_point_rst | 2    | 11208   | 8       | 595  | 2900 | 7713  |
| TR872_cm_excl   | 2    | 24505   | 5       | 2201 | 6844 | 15460 |
| TR872_cm_min    | 2    | 24505   | 5       | 1488 | 4055 | 18962 |
| TR872_point_rst | 2    | 11208   | 8       | 767  | 3268 | 7173  |
| TR762_dist_rst  | 3    | 12008   | 8       | 0    | 8    | 12000 |
| TR762_no_rst    | 3    | 11208   | 8       | 0    | 8    | 11200 |

S2 Table. : Trajectory and cross validation overview for all protein targets.

| Traj. Name      | Fold | # Snap. | # Traj. | I     | N     | D     |
|-----------------|------|---------|---------|-------|-------|-------|
| TR762_point_rst | 3    | 11208   | 8       | 0     | 1656  | 9552  |
| TR765_dist_rst  | 3    | 12008   | 8       | 11107 | 551   | 350   |
| TR765_no_rst    | 3    | 11208   | 8       | 8259  | 963   | 1986  |
| TR765_point_rst | 3    | 11208   | 8       | 10719 | 425   | 64    |
| TR828_dist_rst  | 3    | 12008   | 8       | 3     | 13    | 11992 |
| TR828_no_rst    | 3    | 11208   | 8       | 1     | 15    | 11192 |
| TR828_point_rst | 3    | 11208   | 8       | 7     | 57    | 11144 |
| TR833_dist_rst  | 3    | 12008   | 8       | 2     | 83    | 11923 |
| TR833_no_rst    | 3    | 11208   | 8       | 1     | 64    | 11143 |
| TR833_point_rst | 3    | 11208   | 8       | 1232  | 4336  | 5640  |
| TR928_cm_excl   | 3    | 24505   | 5       | 0     | 0     | 24505 |
| TR928_cm_min    | 3    | 24505   | 5       | 0     | 0     | 24505 |
| TR928_point_rst | 3    | 11208   | 8       | 0     | 0     | 11208 |
| TR945_cm_excl   | 3    | 24505   | 5       | 139   | 13368 | 10998 |
| TR945_cm_min    | 3    | 24505   | 5       | 116   | 10678 | 13711 |
| TR945_point_rst | 3    | 11208   | 8       | 265   | 7400  | 3543  |
| TR817_dist_rst  | 4    | 12008   | 8       | 843   | 958   | 10207 |
| TR817_no_rst    | 4    | 11208   | 8       | 326   | 576   | 10306 |
| TR817_point_rst | 4    | 11208   | 8       | 73    | 6538  | 4597  |
| TR821_dist_rst  | 4    | 12008   | 8       | 5115  | 1530  | 5363  |
| TR821_no_rst    | 4    | 11208   | 8       | 5235  | 1458  | 4515  |
| TR829_dist_rst  | 4    | 12008   | 8       | 84    | 425   | 11499 |
| TR829_no_rst    | 4    | 11208   | 8       | 41    | 371   | 10796 |
| TR829_point_rst | 4    | 11208   | 8       | 3213  | 4337  | 3658  |
| TR857_dist_rst  | 4    | 12008   | 8       | 1933  | 2781  | 7294  |
| TR857_no_rst    | 4    | 11208   | 8       | 1734  | 1944  | 7530  |
| TR857_point_rst | 4    | 11208   | 8       | 1870  | 3345  | 5993  |
| TR870_cm_excl   | 4    | 24505   | 5       | 17    | 343   | 24145 |
| TR870_cm_min    | 4    | 24505   | 5       | 617   | 2950  | 20938 |
| TR870_point_rst | 4    | 11208   | 8       | 153   | 1718  | 9337  |
| TR944_cm_excl   | 4    | 24505   | 5       | 86    | 2461  | 21958 |
| TR944_cm_min    | 4    | 24505   | 5       | 578   | 3006  | 20921 |
| TR944_point_rst | 4    | 11208   | 8       | 59    | 2130  | 9019  |
| TR769_dist_rst  | 5    | 12008   | 8       | 2004  | 1537  | 8467  |
| TR769_no_rst    | 5    | 11208   | 8       | 3089  | 1880  | 6239  |
| TR774_dist_rst  | 5    | 12008   | 8       | 1     | 46    | 11961 |
| TR774_no_rst    | 5    | 11208   | 8       | 1     | 44    | 11163 |
| TR774_point_rst | 5    | 11208   | 8       | 6     | 1028  | 10174 |
| TR792_dist_rst  | 5    | 12008   | 8       | 2815  | 2383  | 6810  |
| TR792_no_rst    | 5    | 11208   | 8       | 3906  | 2620  | 4682  |
| TR792_point_rst | 5    | 11208   | 8       | 2811  | 4515  | 3882  |
| TR795_dist_rst  | 5    | 12008   | 8       | 373   | 1367  | 10268 |
| TR795_point_rst | 5    | 11208   | 8       | 1956  | 7702  | 1550  |
| TR848_dist_rst  | 5    | 12008   | 8       | 1     | 22    | 11985 |
| TR848_no_rst    | 5    | 11208   | 8       | 2     | 53    | 11153 |
| TR848_point_rst | 5    | 11208   | 8       | 77    | 1541  | 9590  |
| TR893_cm_excl   | 5    | 24505   | 5       | 0     | 121   | 24384 |
| TR893_cm_min    | 5    | 24505   | 5       | 0     | 21    | 24484 |
| TR893_point_rst | 5    | 11208   | 8       | 0     | 45    | 11163 |
| TR228_dist_rst  | 6    | 12008   | 8       | 3073  | 3563  | 5372  |
| TR228_no_rst    | 6    | 11208   | 8       | 4852  | 2362  | 3994  |
| TR228_point_rst | 6    | 11208   | 8       | 5893  | 2875  | 2440  |
| TR768_dist_rst  | 6    | 12008   | 8       | 50    | 591   | 11367 |
| TR768_no_rst    | 6    | 11208   | 8       | 59    | 491   | 10658 |
| TR768_point_rst | 6    | 11208   | 8       | 1190  | 4161  | 5857  |
| TR776_dist_rst  | 6    | 12008   | 8       | 0     | 20    | 11988 |
| TR776_no_rst    | 6    | 11208   | 8       | 0     | 15    | 11193 |

S2 Table. : Trajectory and cross validation overview for all protein targets.

| <b>Traj. Name</b> | <b>Fold</b> | <b># Snap.</b> | <b># Traj.</b> | <b>I</b> | <b>N</b> | <b>D</b> |
|-------------------|-------------|----------------|----------------|----------|----------|----------|
| TR776_point_rst   | 6           | 11208          | 8              | 312      | 7811     | 3085     |
| TR783_dist_rst    | 6           | 12008          | 8              | 10       | 49       | 11949    |
| TR783_no_rst      | 6           | 11208          | 8              | 0        | 55       | 11153    |
| TR783_point_rst   | 6           | 11208          | 8              | 93       | 1640     | 9475     |
| TR803_dist_rst    | 6           | 12008          | 8              | 215      | 1387     | 10406    |
| TR803_no_rst      | 6           | 11208          | 8              | 8        | 351      | 10849    |
| TR803_point_rst   | 6           | 11208          | 8              | 228      | 1006     | 9974     |
| TR868_cm_excl     | 6           | 24505          | 5              | 329      | 542      | 23634    |
| TR868_cm_min      | 6           | 24505          | 5              | 76       | 503      | 23926    |
| TR868_point_rst   | 6           | 11208          | 8              | 592      | 1293     | 9323     |
