# Supplementary material for: Predicting improved protein conformations with a temporal deep recurrent neural network
Source: PLOS journal article supplement (doi:10.1371/journal.pone.0202652), 2018-09-04
Supplement: S3 (10.1371/journal.pone.0202652.s003) [file journal.pone.0202652.s003]

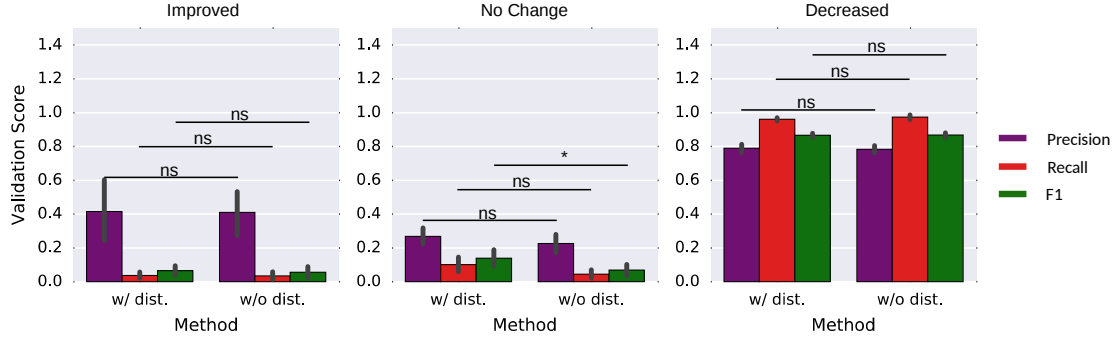

S3 Fig. : Comparison of DeepTrajectory classification performance with and without distance metric features. Classification performance is shown for all three classes improved, no-change and decreased. Models with and without features RMSD.SM and GDTTS.SM are denoted as w/ dist. and w/o dist. in the legend, respectively. The colored bars in purple (precision), red (recall) and green (F1) show the mean validation performance and the error bars the standard deviation of the 7-fold cross-validation. The black horizontal lines show the significance with p-value < 0.05 (\*) and non-significance with p-value ≥ 0.05 (ns) between two groups as computed by the Wilcoxon rank-sum test.
