# Supplementary material for: Predicting improved protein conformations with a temporal deep recurrent neural network
Source: PLOS journal article supplement (doi:10.1371/journal.pone.0202652), 2018-09-04
Supplement: S5 (10.1371/journal.pone.0202652.s005) [file journal.pone.0202652.s005]

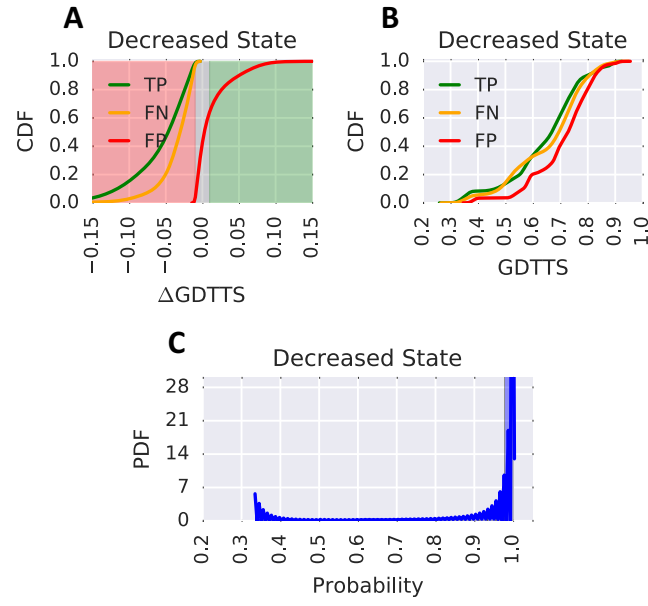

S5 Fig. : (A) Cumulative distribution of true positive (TP), false negative (FN) and false positive (FP) predictions for the decreased state as a function of  $\Delta\text{GDTTS}$ . The background colours red, gray and green indicate the  $\Delta\text{GDTTS}$  regions for the improved, no-change and decreased states, respectively. (B) Cumulative distribution of true positive (TP), false negative (FN) and false positive (FP) predictions for the decreased state as a function of GDTTS. (C) Show the distribution of assigned probabilities for decreased state predictions.
